# Supplementary material for: Direct observation of melting behaviors at the nanoscale under electron beam and heat to form hollow nanostructures
Source: Royal Society of Chemistry journal article supplement (doi:10.1039/c2nr30724c), 2012-01-01
Supplement: c2nr30724c.pdf [file c2nr30724c.pdf]

# Direct Observation of Melting Behaviors at Nanoscale Under Electron Beams and Heat to form Hollow Nanostructures

*Chun-Wei Huang<sup>a</sup>, Cheng-Lun Hsin<sup>a</sup>, Chun-Wen Wang<sup>a</sup>, Fu-Hsuan Chu<sup>a</sup>, Chen-Yen Kao<sup>a</sup>, Jui-Yuan Chen<sup>a</sup>, Yu-Ting Huang<sup>a</sup>, Kuo-Chang Lu<sup>c</sup>, Wen -Wei Wu <sup>a\*</sup>, and Lih-Juann Chen<sup>b\*</sup>*

<sup>a</sup>Department of Materials Science and Engineering, National Chiao Tung University, Hsinchu 300, Taiwan

<sup>b</sup> Department of Materials Science and Engineering, National Tsing Hua University, Hsinchu 300, Taiwan

<sup>c</sup>Department of Materials Science and Engineering National Cheng Kung University, Tainan 701, Taiwan

\*Address Correspondence to [wwwu@mail.nctu.edu.tw](mailto:wwwu@mail.nctu.edu.tw) ; [ljchen@mx.nthu.edu.tw](mailto:ljchen@mx.nthu.edu.tw)

## Table of Contents:

**Fig. S-1** : Pristine ZnO nanowire without Al<sub>2</sub>O<sub>3</sub> shell coverage. The ZnO nanowire will maintain the morphology at 600 °C under electron irradiation for 1 hr.

**Fig. S-2** : TEM images of the single crystalline Al<sub>2</sub>O<sub>3</sub> nanotubes with remained ZnO at the end of the tube.

**Fig. S-3** : Al<sub>2</sub>O<sub>3</sub> nanostructures with controlled thickness by atomic-layer-deposition on inner ZnO nanostructure with various geometries.

**Supporting video-1** : The observation of the melting behaviour occurred at the interface between ZnO core and Al<sub>2</sub>O<sub>3</sub> shell.

**Supporting video-2** : Two different stages of the ZnO melting in this video: transformation and liquefaction, followed by electron-beam-irradiation-induced drainage.

**Supporting video-3** : The one-way drainage of the liquidized ZnO droplet along the [0001] ZnO growth direction with a straight and single crystalline Al<sub>2</sub>O<sub>3</sub> nanotube at high temperature in this video.

Figures S-1, S-2 and S-3 were supplementary information to provide the electron irradiation effect of the pristine ZnO nanowire as a comparison. In Fig.S-1 (a), ZnO nanowire was not coated with Al<sub>2</sub>O<sub>3</sub> shell. In Fig.S-1 (b), the ZnO nanowire will maintain the morphology at 600 °C under electron irradiation for 1 hr, proving the effect of the Al<sub>2</sub>O<sub>3</sub> shell on the liquefaction and the drainage of the ZnO core.

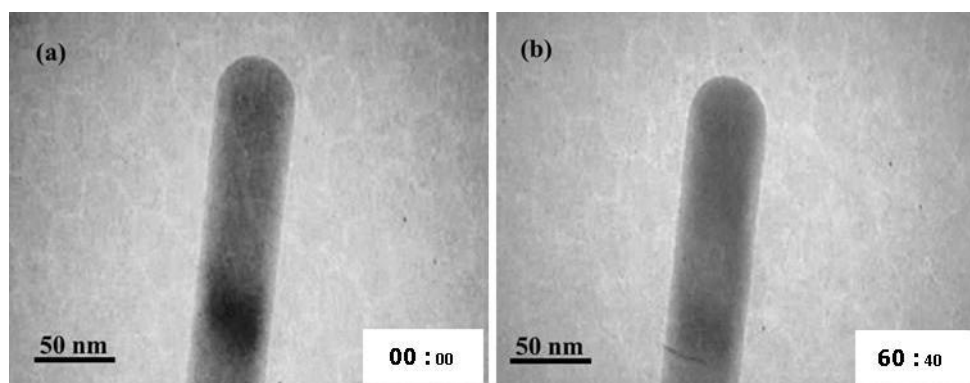

**Fig. S-1** (a) Pristine ZnO nanowire without Al<sub>2</sub>O<sub>3</sub> shell coverage. (b) After electron beam irradiation over 60 min at 600 °C. If there is no Al<sub>2</sub>O<sub>3</sub> shell, the ZnO core will not melt at the same observation condition.

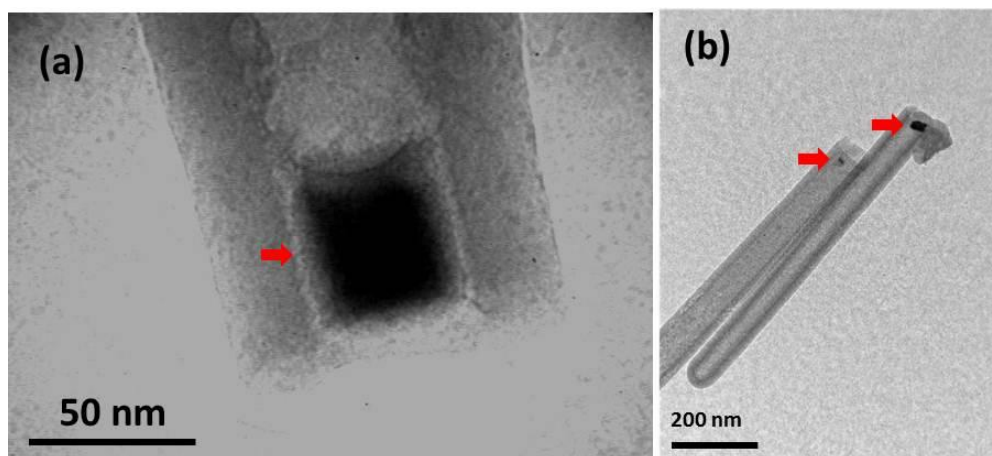

**Fig. S-2** TEM images of the single crystalline  $\text{Al}_2\text{O}_3$  nanotubes with remained ZnO at the end of the tube (red arrow mark). (a) high magnification TEM image and (b) low magnification TEM image show the remnant ZnO at the open-end.

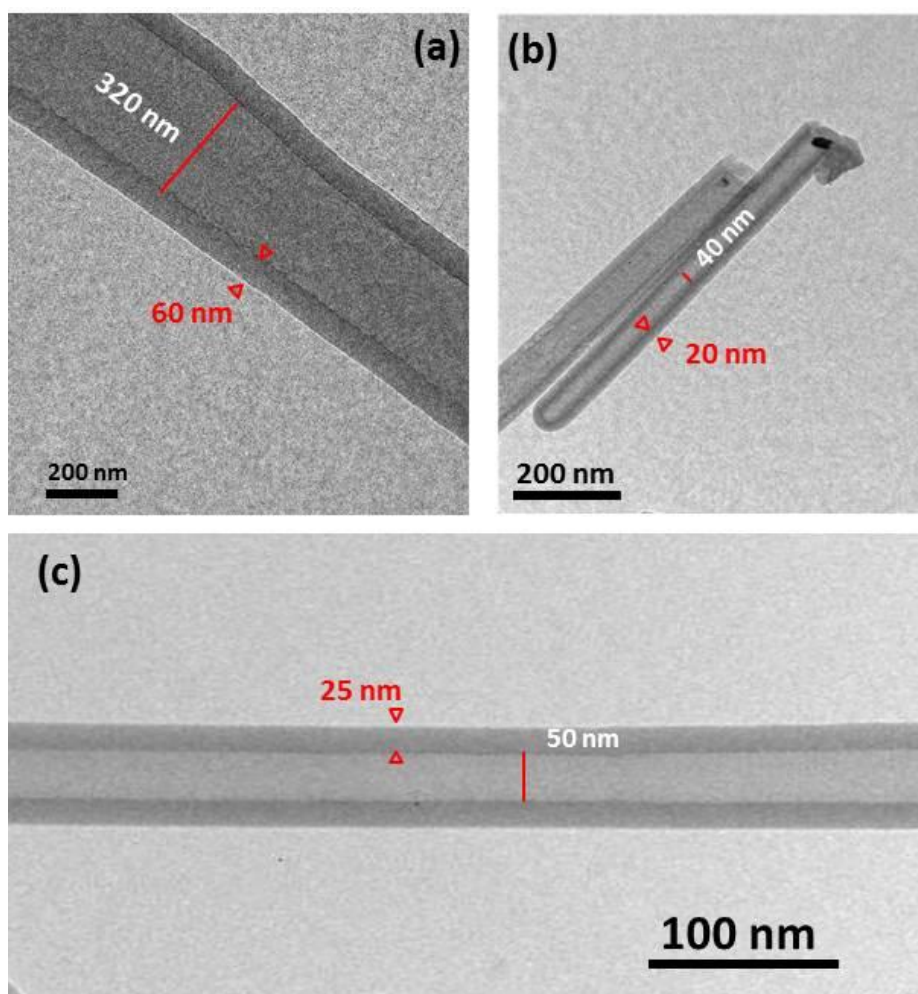

**Fig. S-3** Al<sub>2</sub>O<sub>3</sub> nanostructures with controlled thickness by atomic-layer-deposition on inner ZnO nanostructure with (a) 60, (b) 20 and (c) 25 nm in thickness. The shell of Al<sub>2</sub>O<sub>3</sub> nanotubes are with different inner diameters. The diameter of the pristine ZnO nanowires is mainly in the range from 40 to 320 nm.

Three in-situ TEM videos as supplementary online material were presented to show the dynamic observation of the ZnO/Al<sub>2</sub>O<sub>3</sub> core/shell nanowire heterostructures to form the Al<sub>2</sub>O<sub>3</sub> nanotube at 600 °C under electron irradiation

**Supporting video-1 :** The video shows that the melting behavior was occurred at the interface between ZnO core and Al<sub>2</sub>O<sub>3</sub> shell. The ZnO was drained away quickly at 00:04 (red arrow mark). The spherical voids were exhibited at the core/shell nanostructure in this video. We believe that the high interfacial energy between Al<sub>2</sub>O<sub>3</sub> and ZnO could be the driving force of the observed reaction.

**Supporting video-2:** Two different stages of the ZnO melting in this video: transformation and liquefaction, followed by electron-beam-irradiation-induced drainage. In this video, it shows two different stages of the ZnO drainage at the open end of the tube. First is the melting and transforming into liquid. Second is that the drainage rate of ZnO increases under electrons irradiation.

**Supporting video-3:** The one-way drainage of the liquidized ZnO droplet along the [0001] ZnO growth direction at high temperature was recorded in this video. We observed that the ZnO core was liquidized and disappeared along the [0001] growth direction, leaving a clear and straight single crystalline Al<sub>2</sub>O<sub>3</sub> nanotubes at high temperature.
